# Supplementary material for: Rhoifolin loaded in PLGA nanoparticles alleviates oxidative stress and inflammation in vitro and in vivo
Source: Royal Society of Chemistry journal article supplement (doi:10.1039/d2bm00309k), 2022-01-01
Supplement: d2bm00309k1.pdf [file d2bm00309k1.pdf]

*Electronic supplementary information (ESI) for:*

**Rhoifolin Loaded in PLGA Nanoparticles Alleviates Oxidative Stress and  
Inflammation *In Vitro* and *In Vivo*<sup>†</sup>**

Even Al-Shalabi, Samah Abusulieh, Alaa M. Hammad, and Suhair Sunoqrot\*

*Department of Pharmacy, Faculty of Pharmacy, Al-Zaytoonah University of Jordan, Amman  
11733, Jordan*

**\*Corresponding Author:**

Suhair Sunoqrot, PhD  
Associate Professor of Pharmaceutics  
Department of Pharmacy  
Faculty of Pharmacy  
Al-Zaytoonah University of Jordan  
P.O. Box 130, Amman 11733, Jordan  
Phone: +962-6-4291511 Ext. 197  
Fax: +962-6-4291432  
Email: [suhair.sunoqrot@zuj.edu.jo](mailto:suhair.sunoqrot@zuj.edu.jo)

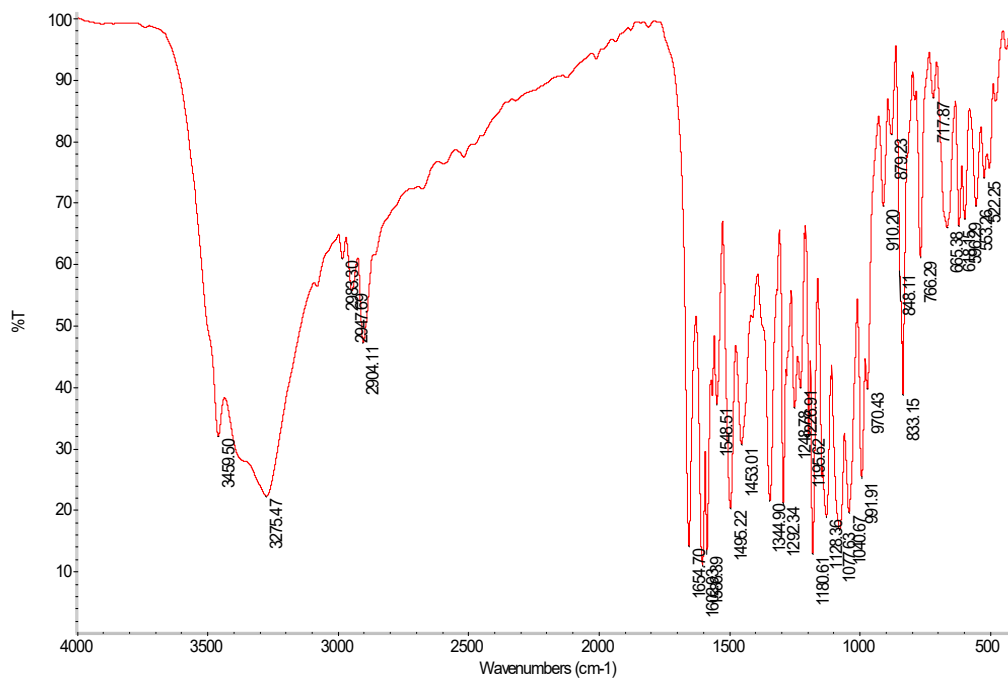

**Figure S1.** IR spectrum of ROF.

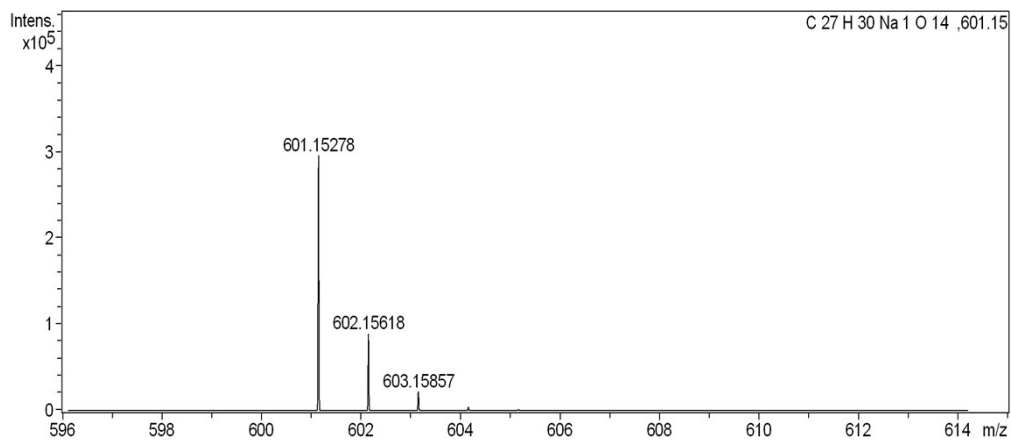

**Figure S2.** Mass spectrum of ROF.

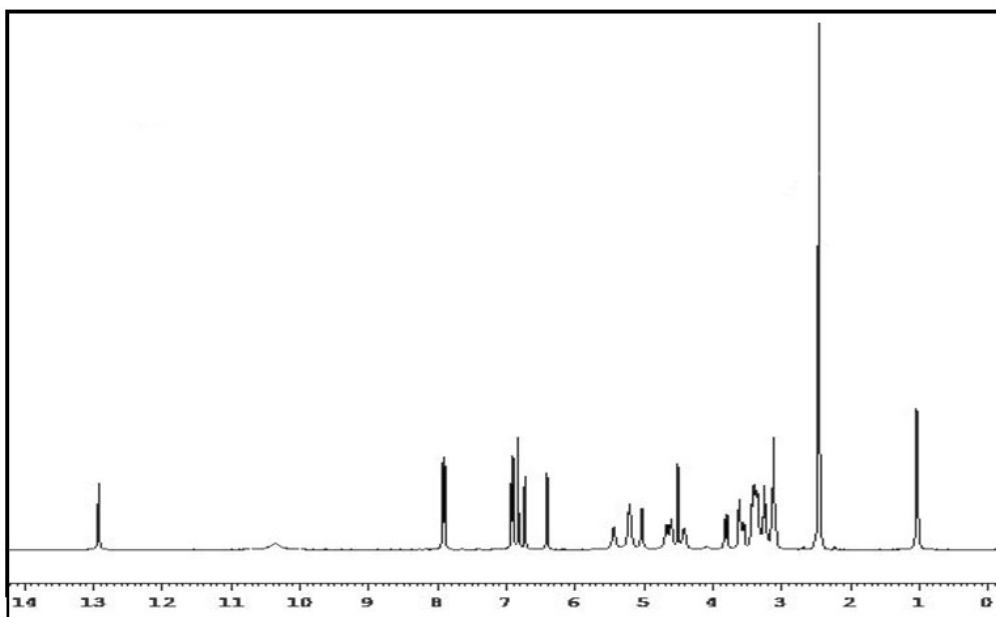

**Figure S3.**  $^1\text{H}$  NMR ( $\text{DMSO-d}_6$ ) spectrum of ROF.

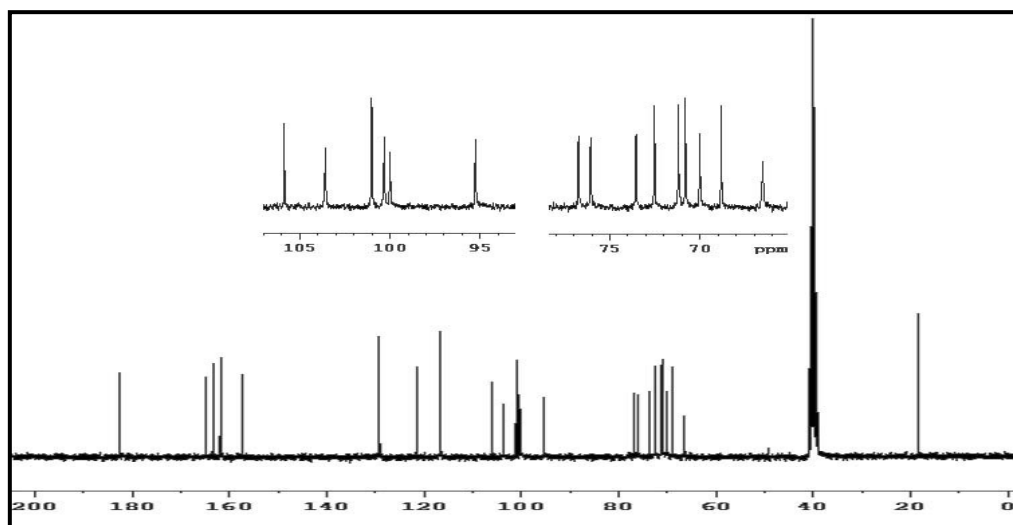

**Figure S4.**  $^{13}\text{C}$  NMR ( $\text{DMSO-d}_6$ ) spectrum of ROF.

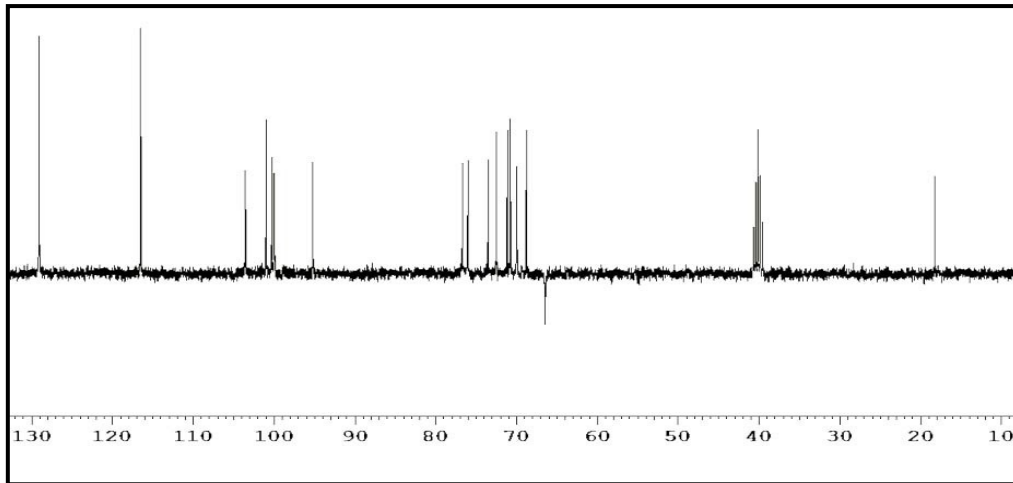

**Figure S5.** DEPT 135(DMSO-d<sub>6</sub>) spectrum of ROF.

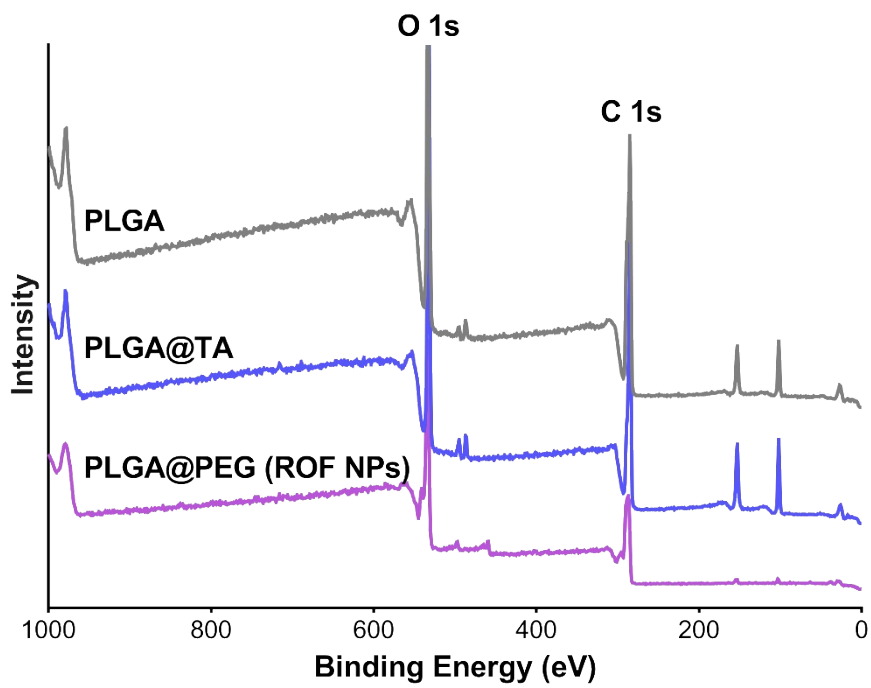

**Figure S6.** XPS Survey scans of ROF NPs before and after TA coating and PEGylation.

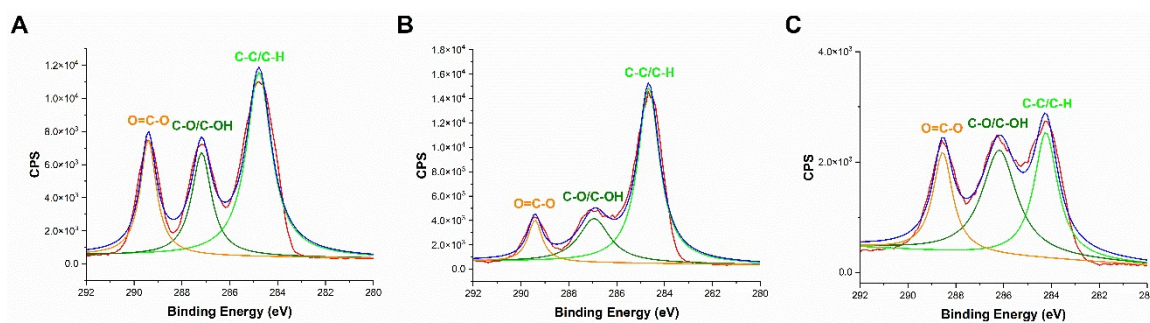

**Figure S7.** Deconvoluted high-resolution spectra of C 1s regions of (A) uncoated PLGA NPs, (B) PLGA@TA NPs, and (C) PLGA@PEG NPs.

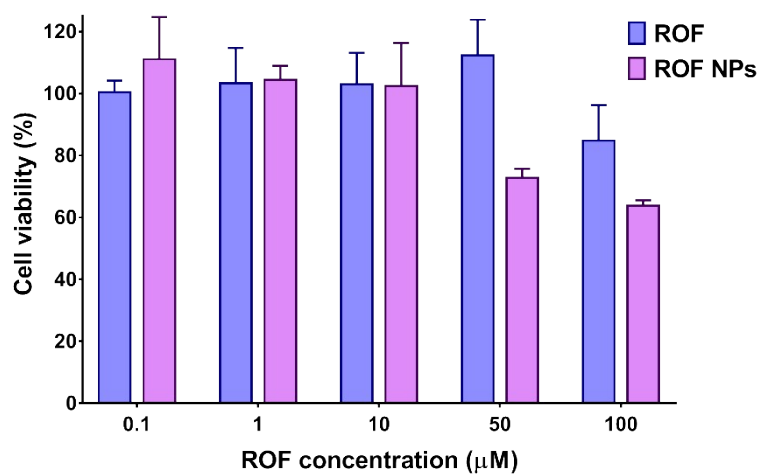

**Figure S8.** Cell viability of RAW 264.7 macrophages incubated with various concentrations of ROF and ROF NPs for 24 h (n=5).
